# Supplementary material for: The Performance of GALAD Score for Diagnosing Hepatocellular Carcinoma in Patients with Chronic Liver Diseases: A Systematic Review and Meta-Analysis
Source: MDPI journal article supplement (doi:10.3390/jcm12030949), 2023-01-26
Supplement: s1 [file s1]

## Supplementary Materials

### The Performance of GALAD Score for Diagnosing Hepatocellular Carcinoma in Patients with Chronic Liver Diseases: A Systematic Review and Meta-Analysis

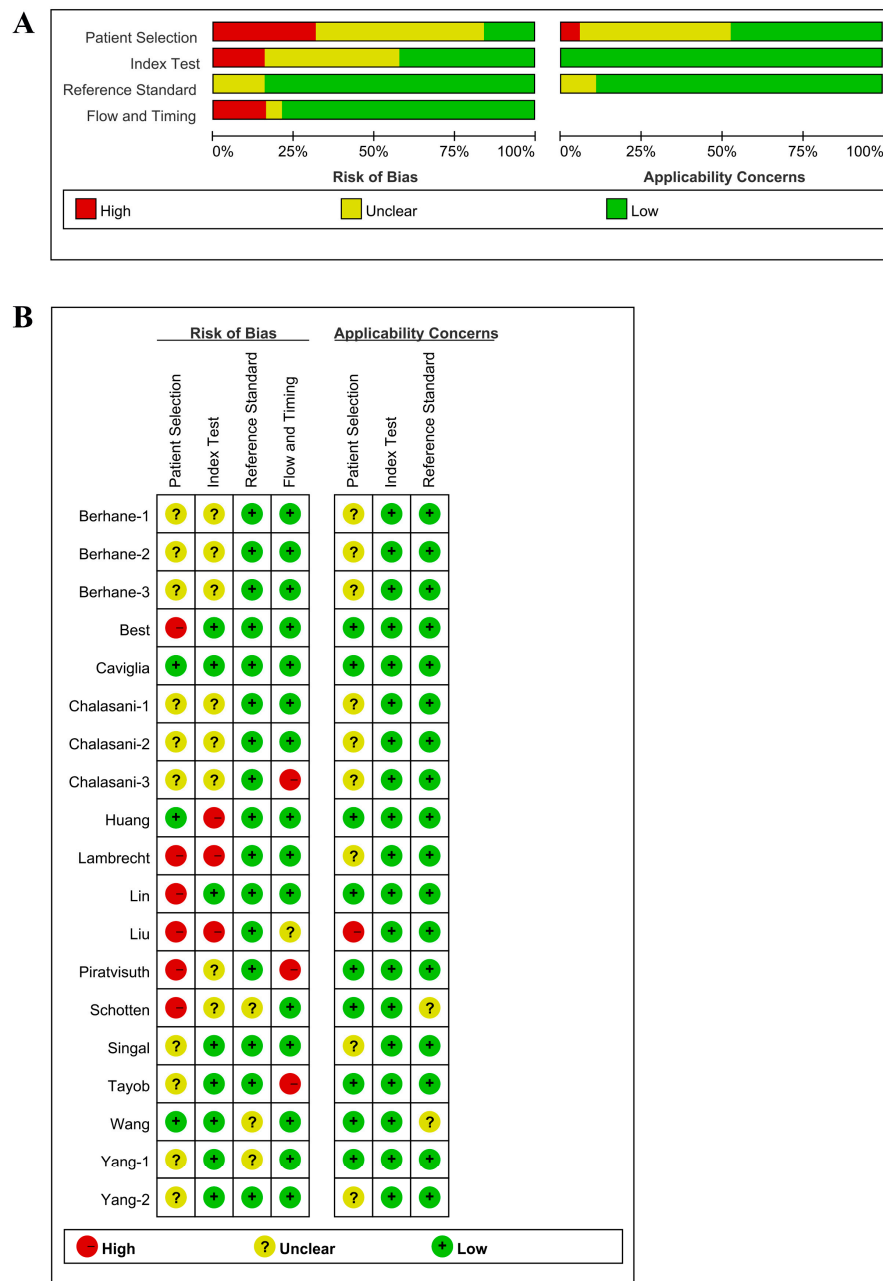

**Figure S1.** Quality evaluation of included studies. A) Methodological quality graph; B) Methodological quality summary.

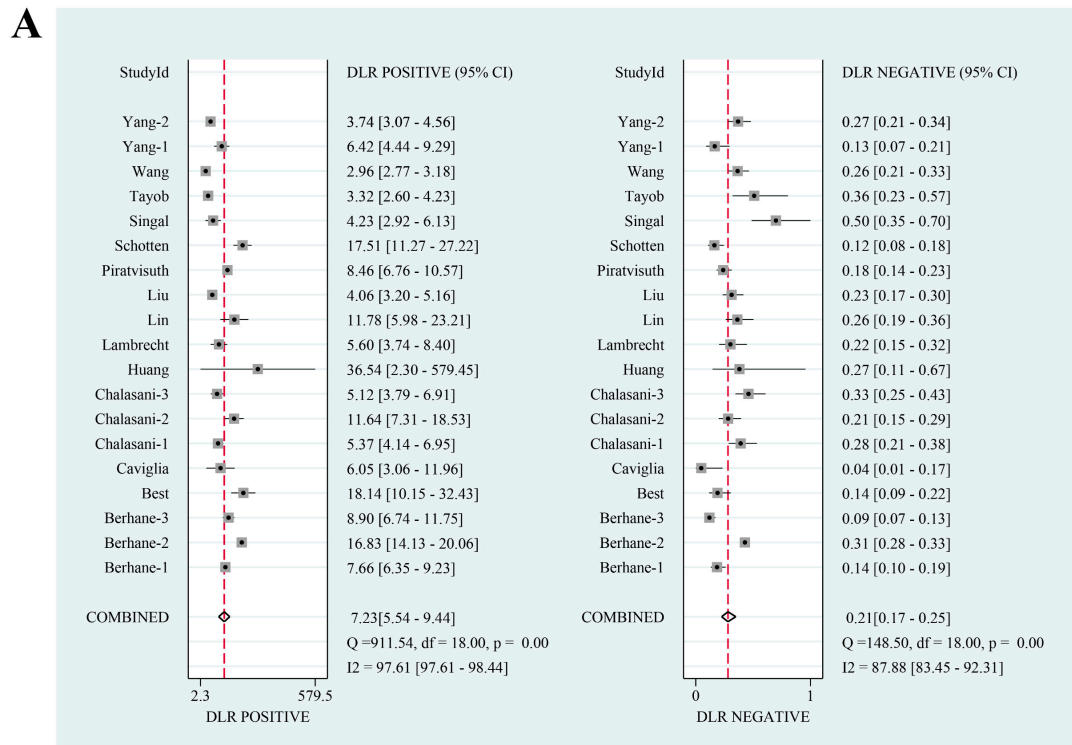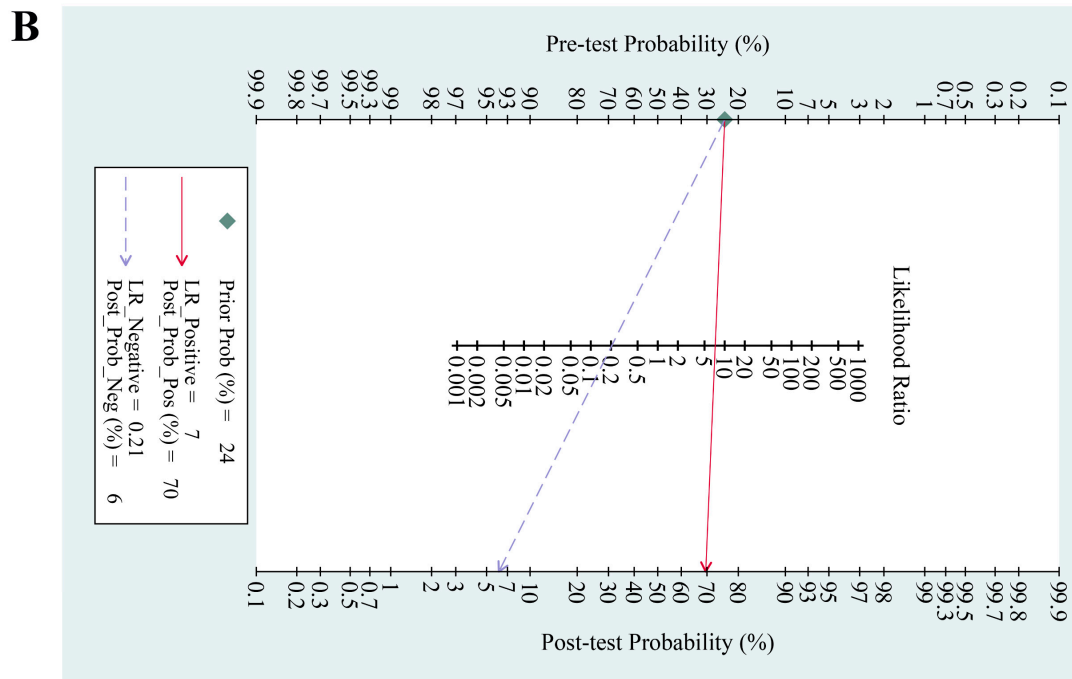

**Figure S2.** The pooled positive and negative likelihood ratio with Forest plots (A) and Fagan diagram (B) assessing the overall diagnostic value of GALAD score for discriminating any-stage hepatocellular carcinoma in chronic liver disease.

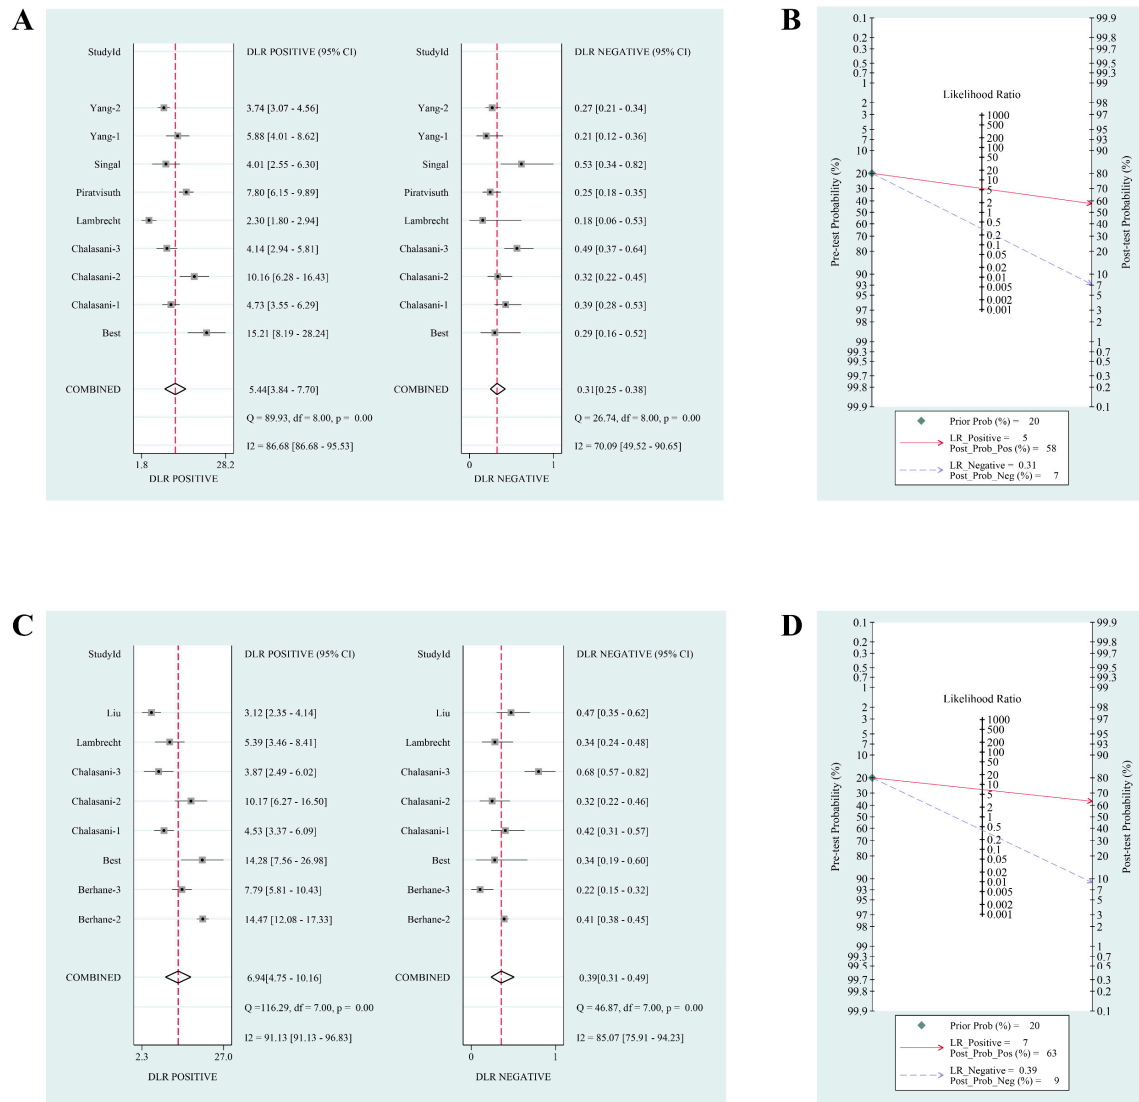

**Figure S3.** The pooled positive and negative likelihood ratio with Forest plots and Fagan diagram assessing the overall diagnostic value of GALAD score for discriminating early-stage hepatocellular carcinoma within Barcelona Clinic Liver Cancer 0/A staging (A, B) or within Milan criteria (C, D).

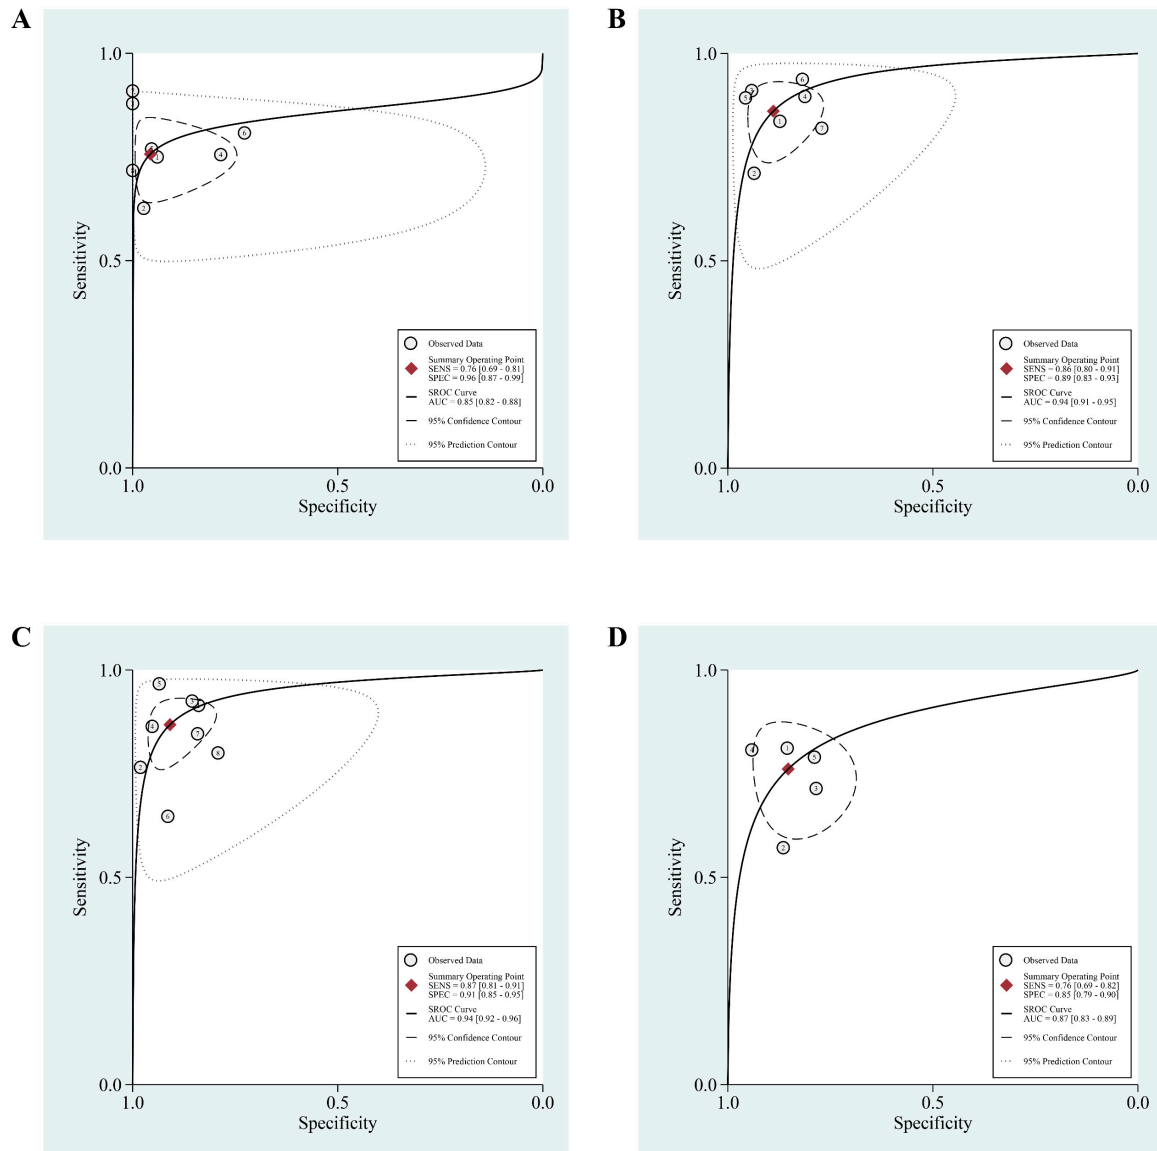

**Figure S4.** The summary receiver operating characteristic curves of GALAD score for discriminating hepatocellular carcinoma in patients with different etiologies. A) hepatitis B virus; B) hepatitis C virus; C) non-viral liver diseases; D) cirrhosis.

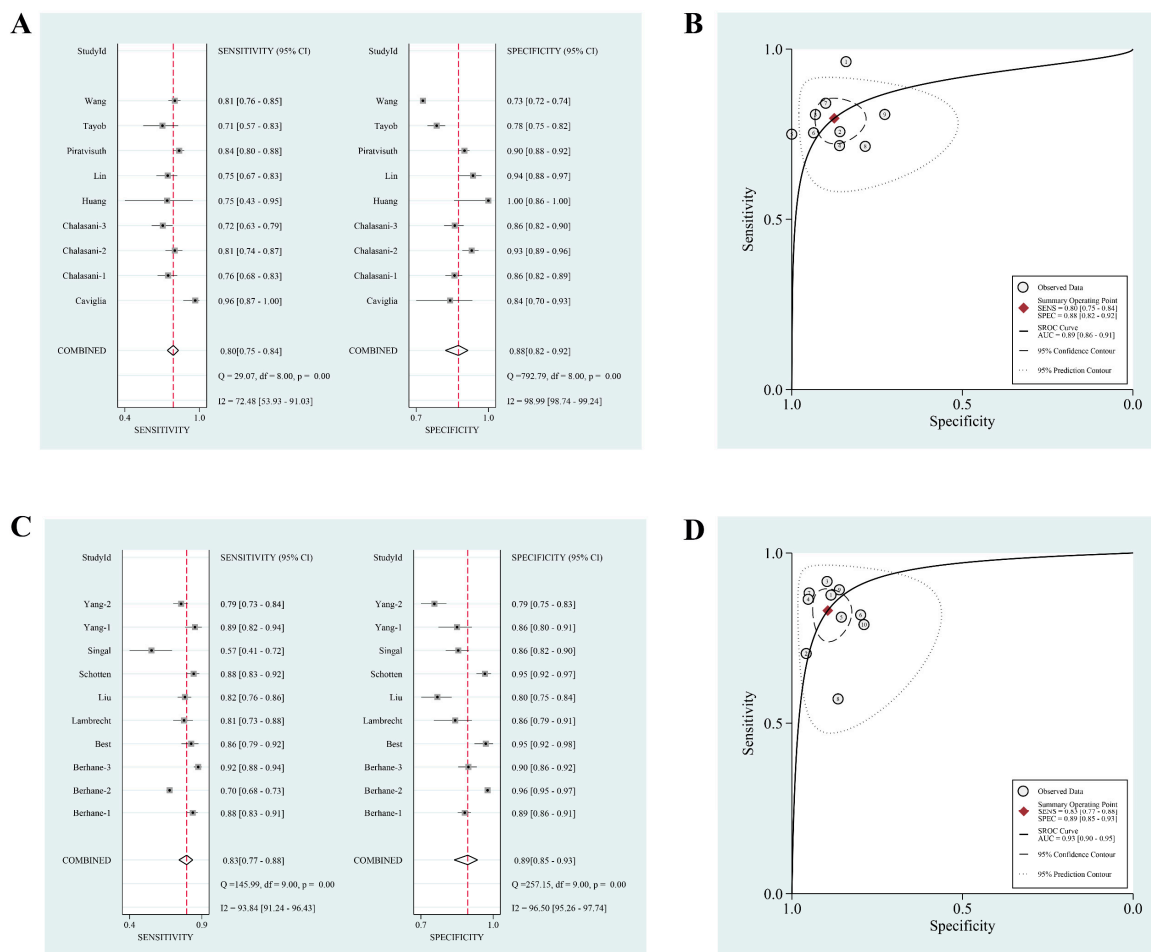

**Figure S5.** The pooled sensitivity and specificity with Forest plots and summary receiver operating characteristic curve of GALAD score for discriminating any-stage hepatocellular carcinoma in prospective (A, B) and retrospective (C, D) cohorts.

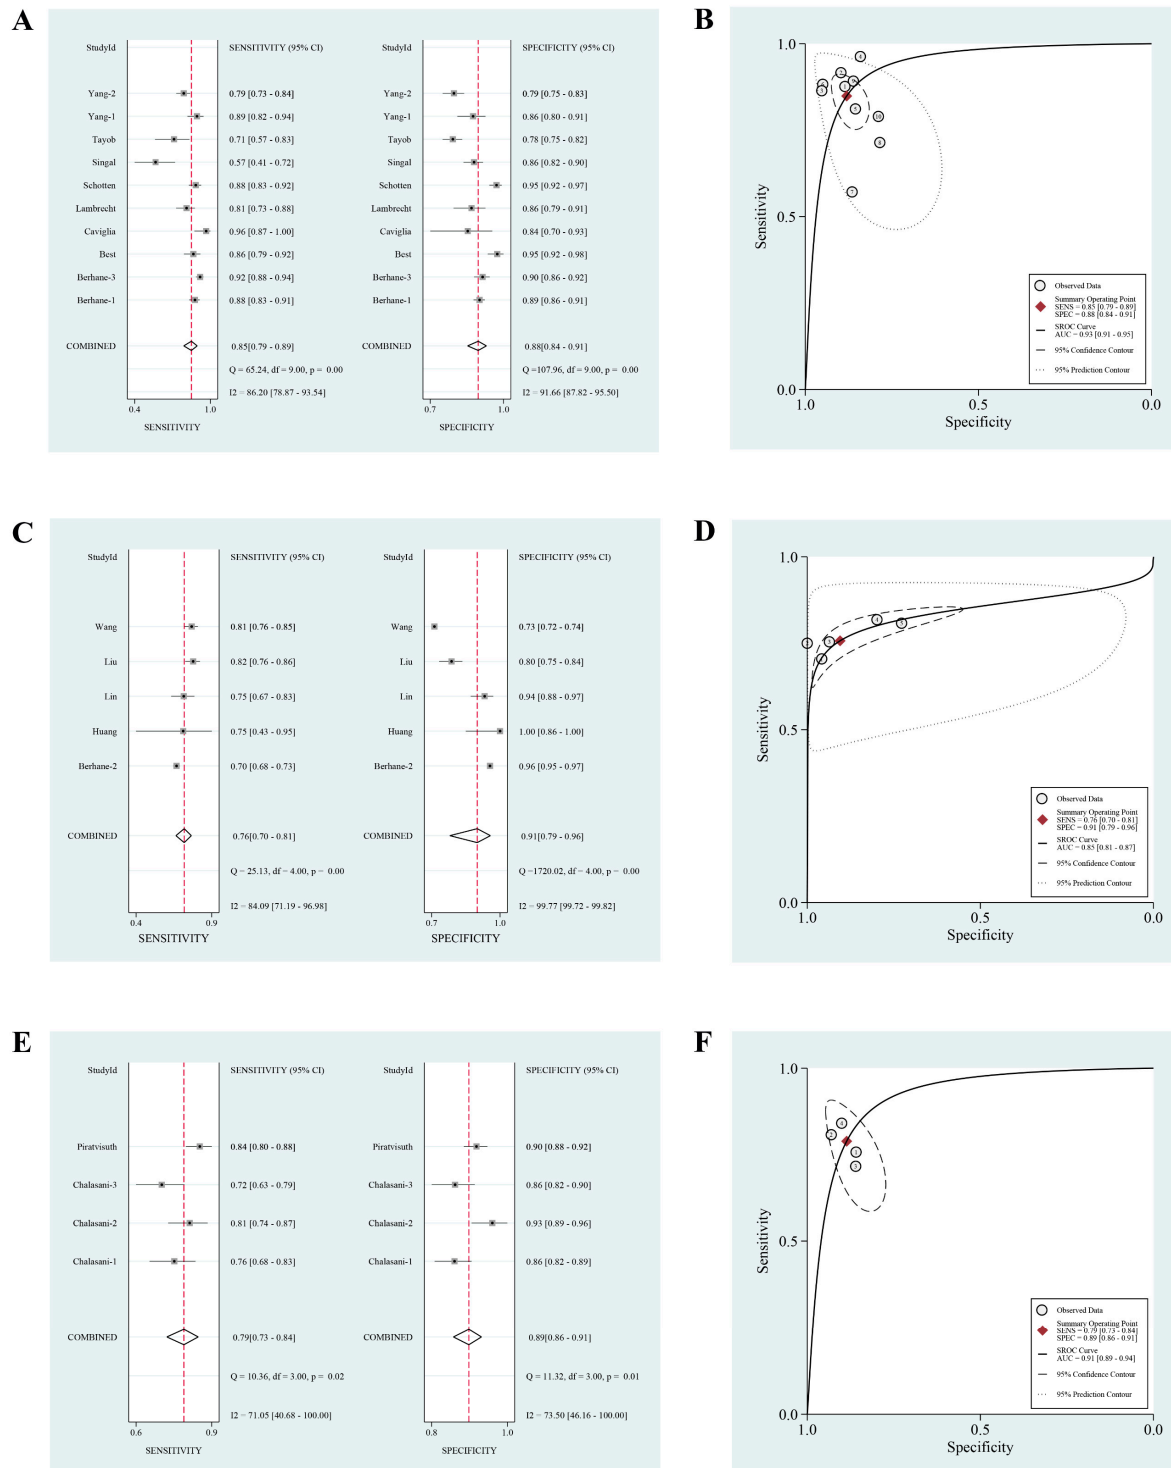

**Figure S6.** The pooled sensitivity and specificity with Forest plots and summary receiver operating characteristic curve of GALAD score for discriminating any-stage hepatocellular carcinoma in Western countries (A, B), East-Asian countries (C, D), and countries from different continents (E, F).

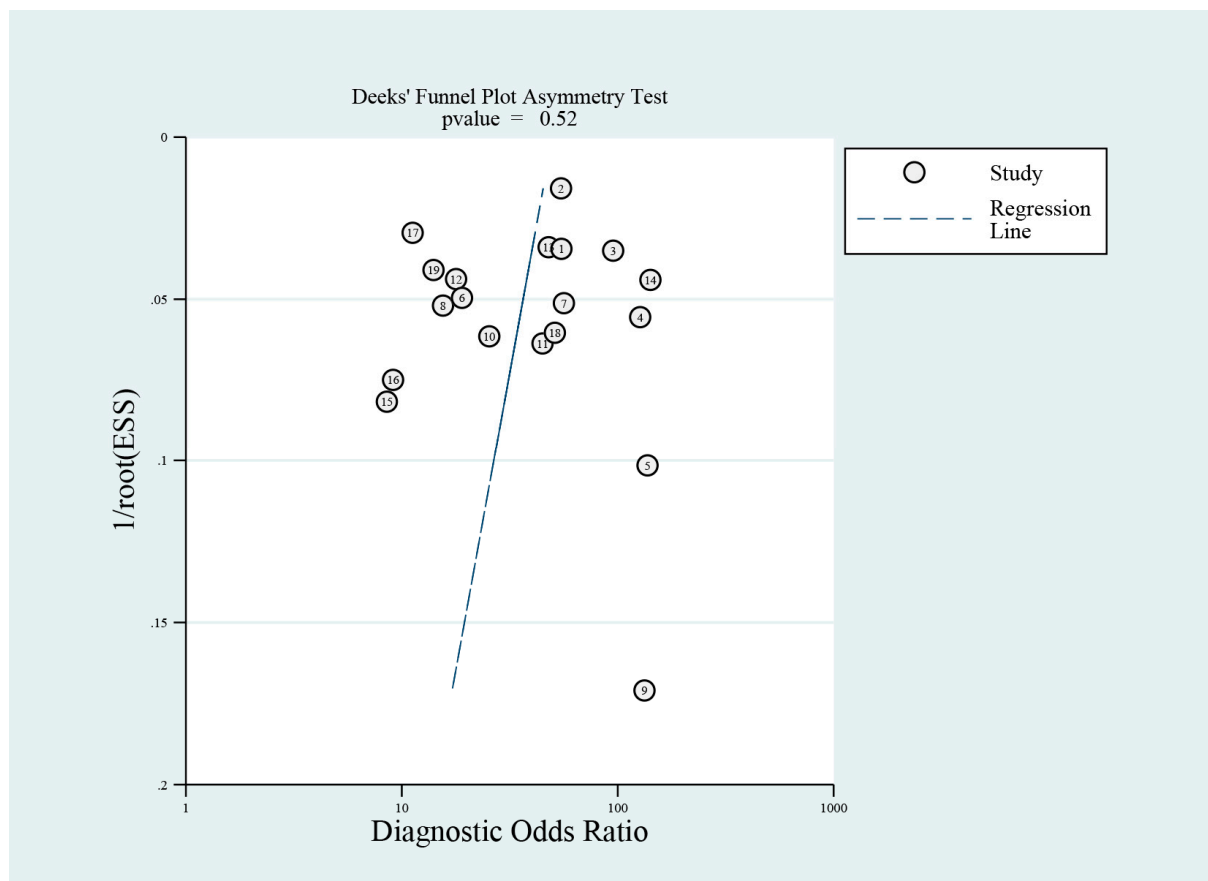

**Figure S7.** Deeks' plot for publication bias.

**Table S1.** Search strategies in the *Web of Science*, *PubMed*, *Scopus*, *Ovid*, *Cochrane Library*, and *Embase* databases.

| Database                       | No. | Query                                                                                                  | Results |
|--------------------------------|-----|--------------------------------------------------------------------------------------------------------|---------|
| <b><i>PubMed</i></b>           | #3  | #1 AND #2                                                                                              | 27      |
|                                | #2  | GALAD                                                                                                  | 36      |
|                                | #1  | (((Hepatocellular Carcinoma) OR (Liver Cancer)) OR (Hepatoma)) OR (Liver Cell Carcinoma)               | 340,230 |
| <b><i>Embase</i></b>           | #3  | #1 AND #2                                                                                              | 65      |
|                                | #2  | GALAD                                                                                                  | 80      |
|                                | #1  | (‘hepatocellular carcinoma’) OR hepatoma OR (‘liver cancer’) OR (‘liver cell carcinoma’)               | 268,971 |
| <b><i>Web of Science</i></b>   | #3  | #1 AND #2                                                                                              | 53      |
|                                | #2  | TS=(GALAD)                                                                                             | 58      |
|                                | #1  | (((TS=(hepatocellular carcinoma)) OR TS=(hepatoma)) OR TS=(liver cancer)) OR TS=(Liver Cell Carcinoma) | 438,736 |
| <b><i>Cochrane Library</i></b> | #3  | #1 AND #2                                                                                              | 1       |
|                                | #2  | GALAD                                                                                                  | 18      |
|                                | #1  | (hepatocellular carcinoma) OR (hepatoma) OR (liver cancer) OR (Liver Cell Carcinoma)                   | 16,941  |



---

|               |    |                                                                                          |           |
|---------------|----|------------------------------------------------------------------------------------------|-----------|
| <b>Scopus</b> | #3 | #1 AND #2                                                                                | 223       |
|               | #2 | GALAD                                                                                    | 1,513     |
|               | #1 | (((Hepatocellular Carcinoma) OR (Liver Cancer)) OR (Hepatoma)) OR (Liver Cell Carcinoma) | 1,808,392 |

---

|             |    |                                                                                          |         |
|-------------|----|------------------------------------------------------------------------------------------|---------|
| <b>Ovid</b> | #3 | #1 AND #2                                                                                | 58      |
|             | #2 | GALAD                                                                                    | 88      |
|             | #1 | (((Hepatocellular Carcinoma) OR (Liver Cancer)) OR (Hepatoma)) OR (Liver Cell Carcinoma) | 173,944 |

---

**Table S2.** Proportion of HCC Patients Receiving Different Therapies.

|                           | Berhane-1 [24] | Berhane-2 [24] | Berhane-3 [24] |
|---------------------------|----------------|----------------|----------------|
| Transplantation, %        | 3.6            | 0              | 4.8            |
| Resection, %              | 4.2            | 32.9           | 2.6            |
| Ablative, %               | 3.0            | 26.9           | 10.5           |
| TACE, %                   | 26.2           | 21.0           | 38.0           |
| Sorafenib/chemotherapy, % | 14.3           | 1.1            | 16.0           |
| Supportive, %             | 14.3           | 13.5           | 22.7           |
| Other palliative, %       | 34.5           | 4.6            | 5.4            |

**Table S3.** Univariable Meta-regression

| <b>Parameter</b>   | <b>Category</b> | <b>Number cohorts</b> | <b>Sensitivity (95%CI)</b> | <b><i>P</i> value</b> | <b>Specificity (95%CI)</b> | <b><i>P</i> value</b> |
|--------------------|-----------------|-----------------------|----------------------------|-----------------------|----------------------------|-----------------------|
| studydesign_retro† | Yes             | 10                    | 0.83<br>(0.79-0.88)        | < 0.01                | 0.89<br>(0.86-0.93)        | < 0.01                |
|                    | No              | 9                     | 0.80<br>(0.74-0.86)        | < 0.01                | 0.88<br>(0.83-0.92)        | < 0.01                |
| numberszie_500‡    | Yes             | 10                    | 0.82<br>(0.78-0.87)        | < 0.01                | 0.87<br>(0.83-0.91)        | < 0.01                |
|                    | No              | 9                     | 0.81<br>(0.75-0.87)        | < 0.01                | 0.90<br>(0.87-0.94)        | < 0.01                |
| race_white§        | Yes             | 13                    | 0.83<br>(0.79-0.87)        | < 0.01                | 0.88<br>(0.85-0.92)        | < 0.01                |
|                    | No              | 6                     | 0.79<br>(0.72-0.86)        | < 0.01                | 0.90<br>(0.85-0.95)        | < 0.01                |

CI, confidence intervals.

† The study was design retrospectively (Yes) or prospectively (NO).

‡ The number of study cohort was  $\geq 500$  (Yes) or  $< 500$  (No).

§ The majority of subjects were white (Yes) or not (No).

**Table S4.** Multivariable Meta-regression

| Parameter          | Category | LRTChi2 | <i>P</i> value |
|--------------------|----------|---------|----------------|
| studydesign_retro† | Yes      | 1.04    | 0.60           |
|                    | No       |         |                |
| numbersize_500‡    | Yes      | 1.34    | 0.51           |
|                    | No       |         |                |
| race_white§        | Yes      | 1.45    | 0.49           |
|                    | No       |         |                |

† The study was design retrospectively (Yes) or prospectively (NO).

‡ The number of study cohort was  $\geq 500$  (Yes) or  $< 500$  (No).

§ The majority of subjects were white (Yes) or not (No).

**Table S5.** Alpha-fetoprotein for Detecting Hepatocellular Carcinoma within Barcelona Clinic Liver Cancer 0/A Staging.

| Number of study cohorts | Number HCC | Number control | Pooled Sensitivity (95%CI) | Pooled Specificity (95%CI) | Pooled PLR (95%CI) | Pooled NLR (95%CI)  | DOR (95%CI)  | AUC (95%CI)         |
|-------------------------|------------|----------------|----------------------------|----------------------------|--------------------|---------------------|--------------|---------------------|
| 5                       | 384        | 2038           | 0.38<br>(0.28-0.49)        | 0.97<br>(0.92-0.99)        | 13.4<br>(5.3-33.6) | 0.64<br>(0.54-0.75) | 21<br>(8-52) | 0.70<br>(0.66-0.74) |

**Table S6.** GALAD Score for Discriminating Hepatocellular Carcinoma within Barcelona Clinic Liver Cancer 0/A Staging in Cirrhotic Population.

| Number of study cohorts | Number HCC | Number control | Pooled Sensitivity (95%CI) | Pooled Specificity (95%CI) | Pooled PLR (95%CI) | Pooled NLR (95%CI)  | DOR (95%CI)   | AUC (95%CI)         |
|-------------------------|------------|----------------|----------------------------|----------------------------|--------------------|---------------------|---------------|---------------------|
| 5                       | 365        | 1113           | 0.78<br>(0.66-0.87)        | 0.80<br>(0.72-0.87)        | 4.0<br>(3.0-5.2)   | 0.27<br>(0.18-0.41) | 15<br>(10-20) | 0.86<br>(0.83-0.89) |
